# Supplementary material for: RING-Type E3 Ubiquitin Ligases AtRDUF1 and AtRDUF2 Positively Regulate the Expression of PR1 Gene and Pattern-Triggered Immunity
Source: MDPI journal article supplement (doi:10.3390/ijms232314525), 2022-11-22
Supplement: s1 [file s1]

**Table S1.** List of primers for qRT-PCR

| Gene           | Locus     | primer name | 5'-primer-3'              | Reference                         |
|----------------|-----------|-------------|---------------------------|-----------------------------------|
| <i>AtRDUF1</i> | At3g46620 | Q-RDUF1-F   | TTGATTTGGATAGTGATGGTGAA   |                                   |
|                |           | Q-RDUF1-R   | TTGATGTAACAAGAGAGGTACCAAA |                                   |
| <i>AtRDUF2</i> | At5g59550 | Q-RDUF2-F   | GGTTAGGTCACACGGTACACTCG   |                                   |
|                |           | Q-RDUF2-R   | TTGACCTATCCAAAACCCTAGATTC |                                   |
| <i>AtRDUF3</i> | At2g39720 | Q-RDUF3-F   | ACGAAATTGGCTAGCGTGAT      |                                   |
|                |           | Q-RDUF3-R   | TCGCATAGATTCAAATTTTAGGAA  |                                   |
| <i>ACT2</i>    | At3g18780 | Q-ACT2-F    | AGTGTCTGGATCGGTGGTTC      | (Truman <i>et al.</i> , 2013)     |
|                |           | Q-ACT2-R    | CCCCAGCTTTTAAAGCCTTT      |                                   |
| <i>FLS2</i>    | At5g46330 | Q-FLS2-F    | ACTCTCCTCCAGGGGCTAAGGAT   | (Boutrot <i>et al.</i> , 2010)    |
|                |           | Q-FLS2-R    | AGCTAACAGCTCTCCAGGGATGG   |                                   |
| <i>WRKY18</i>  | At4g31800 | Q-WRKY18-F  | CATACGAAGGGACGCATAAC      | (Birkenbihl <i>et al.</i> , 2017) |
|                |           | Q-WRKY18-R  | CCTTTCGTTTTCTCCAACG       |                                   |
| <i>WRKY33</i>  | At2g38470 | Q-WRKY33-F  | CTCAAGCACCATATACACTTCA    | (Birkenbihl <i>et al.</i> , 2017) |
|                |           | Q-WRKY33-R  | CCTTTGCTCTAGAGAATCCACC    |                                   |
| <i>WRKY40</i>  | At1g80840 | Q-WRKY40-F  | CTTGACTGTGCCGGTGAATA      | (Birkenbihl <i>et al.</i> , 2017) |
|                |           | Q-WRKY40-R  | GAAGAAGCCATTTGCTCCAC      |                                   |
| <i>PR1</i>     | At2g14610 | Q-PR1-F     | TTCTTCCCTCGAAAGCTCAA      | (Lai <i>et al.</i> , 2008)        |
|                |           | Q-PR1-R     | AAGGCCCAACCAGAGTGTATG     |                                   |
| <i>RBOHD</i>   | At5g47910 | Q-RBOHD-F   | CTGGACACGTAAGCTCAGGA      | (Plancot <i>et al.</i> , 2013)    |
|                |           | Q-RBOHD-R   | GCCGAGACCTACGAGGAGTA      |                                   |

Birkenbihl, R. P., Kracher, B., Roccaro, M. and Somssich, I. E. (2017) Induced genome-wide binding of three Arabidopsis WRKY transcription factors during early MAMP-triggered immunity (vol 29, pg 20, 2017). *Plant Cell*, **29**, 1175-1175.

Boutrot, F., Segonzac, C., Chang, K. N., Qiao, H., Ecker, J. R., Zipfel, C., *et al.* (2010) Direct transcriptional control of the Arabidopsis immune receptor FLS2 by the ethylene-dependent transcription factors EIN3 and EIL1. *Proc Natl Acad Sci U S A*, **107**, 14502-14507.

Lai, Z. B., Vinod, K., Zheng, Z. Y., Fan, B. F. and Chen, Z. X. (2008) Roles of Arabidopsis WRKY3 and WRKY4 transcription factors in plant responses to pathogens. *BMC Plant Biol.*, **8**.

- Plancot, B., Santaella, C., Jaber, R., Kiefer-Meyer, M. C., Follet-Gueye, M. L., Leprince, J., *et al.* (2013) Deciphering the Responses of Root Border-Like Cells of Arabidopsis and Flax to Pathogen-Derived Elicitors. *Plant physiology*, **163**, 1584-1597.
- Truman, W., Sreekanta, S., Lu, Y., Bethke, G., Tsuda, K., Katagiri, F., *et al.* (2013) The CALMODULIN-BINDING PROTEIN60 Family Includes Both Negative and Positive Regulators of Plant Immunity. *Plant physiology*, **163**, 1741-1751.
